# Supplementary material for: Safety and efficacy of combination nivolumab plus ipilimumab in patients with advanced melanoma: results from a North American expanded access program (CheckMate 218)
Source: PubMed Central journal article supplement — Melanoma Res. 2020 Nov 23;31(1):67–75. doi: 10.1097/CMR.0000000000000708 (PMC7757740; doi:10.1097/cmr.0000000000000708), 2020-11-23
Supplement: mr-31-67-s001.pdf [file mr-31-67-s001.pdf]

## **DATA SUPPLEMENT**

### **Safety and Efficacy of Combination Nivolumab Plus Ipilimumab in Patients with Advanced Melanoma: Results from a North American Expanded Access Program (CheckMate 218)**

F. Stephen Hodi, Paul B. Chapman, Mario Sznol, Christopher D. Lao, Rene Gonzalez,  
Michael Smylie, Gregory A. Daniels, John A. Thompson, Ragini Kudchadkar, William  
Sharfman, Michael Atkins, David R. Spigel, Anna Pavlick, Jose Monzon, Kevin B. Kim,  
Scott Ernst, Nikhil I. Khushalani, Wim van Dijck, Maurice Lobo, David Hogg

## Supplementary Tables

**Table S1:** Summary of adverse events reported between first dose and 30 days after last dose of the EAP therapy that required immune modulating medications in  $\geq 1\%$  of patients

|                                      | <b>Nivolumab plus ipilimumab<br/>(N=754)</b> |                             |
|--------------------------------------|----------------------------------------------|-----------------------------|
|                                      | <b>Any grade,<br/>N (%)<sup>a</sup></b>      | <b>Grade 3–4,<br/>N (%)</b> |
| Any adverse event                    | 600 (80)                                     | 332 (44)                    |
| Diarrhea                             | 132 (18)                                     | 52 (7)                      |
| Maculopapular rash                   | 115 (15)                                     | 22 (3)                      |
| Colitis                              | 76 (10)                                      | 57 (8)                      |
| Increased alanine aminotransferase   | 72 (10)                                      | 47 (6)                      |
| Increased aspartate aminotransferase | 58 (8)                                       | 32 (4)                      |
| Rash                                 | 52 (7)                                       | 3 (<1)                      |
| Pruritus                             | 47 (6)                                       | 3 (<1)                      |
| Pneumonitis                          | 39 (5)                                       | 9 (1)                       |
| Hypophysitis                         | 38 (5)                                       | 5 (1)                       |
| Autoimmune hepatitis                 | 37 (5)                                       | 28 (4)                      |
| Pruritic rash                        | 29 (4)                                       | 0                           |
| Generalized pruritus                 | 22 (3)                                       | 3 (<1)                      |
| Nausea                               | 20 (3)                                       | 5 (1)                       |
| Adrenal insufficiency                | 18 (2)                                       | 3 (<1)                      |
| Generalized rash                     | 15 (2)                                       | 5 (1)                       |
| Fatigue                              | 14 (2)                                       | 3 (<1)                      |
| Malignant neoplasm progression       | 12 (2)                                       | 11 (1)                      |
| Arthralgia                           | 12 (2)                                       | 2 (<1)                      |
| Vomiting                             | 12 (2)                                       | 2 (<1)                      |
| Uveitis                              | 11 (1)                                       | 1 (<1)                      |
| Headache                             | 11 (1)                                       | 1 (<1)                      |
| increased transaminases              | 11 (1)                                       | 8 (1)                       |
| Macular rash                         | 11 (1)                                       | 2 (<1)                      |
| Pyrexia                              | 10 (1)                                       | 1 (<1)                      |
| Increased lipase                     | 10 (1)                                       | 9 (1)                       |
| Acute kidney injury                  | 9 (1)                                        | 6 (1)                       |
| Hepatitis                            | 9 (1)                                        | 6 (1)                       |
| Cough                                | 9 (1)                                        | 0                           |
| Acneiform dermatitis                 | 9 (1)                                        | 0                           |
| Abdominal pain                       | 8 (1)                                        | 2 (<1)                      |

<sup>a</sup>One grade 5 adverse event (due to malignant neoplasm progression) was reported.

**Table S2:** Immune-modulating concomitant medication for adverse event management

|                                     | <b>Nivolumab plus ipilimumab<br/>(N=754)</b> |
|-------------------------------------|----------------------------------------------|
| Corticosteroid for systemic use     | 571 (76)                                     |
| Prednisone                          | 463 (61)                                     |
| Methylprednisolone                  | 235 (31)                                     |
| Hydrocortisone                      | 105 (14)                                     |
| Dexamethasone                       | 88 (12)                                      |
| Triamcinolone                       | 52 (7)                                       |
| Meprednisone                        | 32 (4)                                       |
| Budesonide                          | 17 (2)                                       |
| Betamethasone                       | 13 (2)                                       |
| Cortisone                           | 7 (1)                                        |
| Fludrocortisone                     | 6 (1)                                        |
| Prednisolone                        | 6 (1)                                        |
| Steroid                             | 3 (<1)                                       |
| Corticosteroid                      | 1 (<1)                                       |
| Corticosteroid, dermatological prep | 208 (28)                                     |
| Topical hydrocortisone              | 74 (10)                                      |
| Topical triamcinolone               | 56 (7)                                       |
| Clobetasol                          | 40 (5)                                       |
| Topical prednisolone                | 15 (2)                                       |
| Topical betamethasone               | 14 (2)                                       |
| Topical cortisone                   | 9 (1)                                        |
| Topical fluticasone                 | 6 (1)                                        |
| Fluocinonide                        | 5 (1)                                        |
| Mometasone                          | 5 (1)                                        |
| Topical dexamethasone               | 3 (<1)                                       |
| Topical prednisone                  | 3 (<1)                                       |
| Betatp/Saltop                       | 2 (<1)                                       |
| Halobetasol                         | 2 (<1)                                       |
| Topical steroid                     | 2 (<1)                                       |
| Topical corticosteroid              | 1 (<1)                                       |
| Desoximetasone                      | 1 (<1)                                       |
| Difluprednate                       | 1 (<1)                                       |
| Fluocinolone                        | 1 (<1)                                       |
| Immunosuppressive agent             | 92 (12)                                      |
| Infliximab                          | 67 (9)                                       |
| Mycophenolic acid                   | 24 (3)                                       |
| Azathioprine                        | 2 (<1)                                       |
| Adalimumab                          | 1 (<1)                                       |
| Tacrolimus                          | 1 (<1)                                       |
| Anti-asthmatic                      | 13 (2)                                       |

|                                | <b>Nivolumab plus ipilimumab<br/>(N=754)</b> |
|--------------------------------|----------------------------------------------|
| Fluticasone                    | 5 (1)                                        |
| Budesi/Formo                   | 4 (1)                                        |
| Beclomethasone                 | 2 (<1)                                       |
| Beclomethasone inhaler         | 2 (<1)                                       |
| Fluticasone inhaler            | 1 (<1)                                       |
| Immune sera and immunoglobulin | 5 (1)                                        |
| Gamma globulin                 | 5 (1)                                        |
| Immunomodulating agent         | 4 (1)                                        |
| Filgrastim                     | 4 (1)                                        |
| Ophthalmological               | 4 (1)                                        |
| Dexa/tobra                     | 2 (<1)                                       |
| Loteprednol                    | 2 (<1)                                       |
| Vasoprotective                 | 3 (<1)                                       |
| Hctop/Pramox                   | 2 (<1)                                       |
| Cincho/escul/framyc/hctop      | 1 (<1)                                       |

## Supplementary Figures

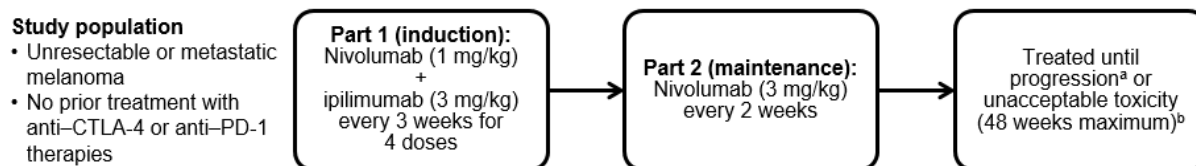

**Fig. S1** CheckMate 218 EAP design. <sup>a</sup>Patients may have been treated beyond progression under protocol-defined circumstances. <sup>b</sup>Patients who discontinued the EAP treatment may have been followed for adverse events. CTLA-4, cytotoxic T lymphocyte antigen-4; PD-1, programmed death 1.
